# Supplementary material
Source: PubMed Central journal article supplement (PMC7222867)
Supplement: 12630_2019_1507_MOESM2_ESM.pdf [file 12630_2019_1507_MOESM2_ESM.pdf]

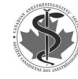

## **APPENDIX 2**

### **American Society of Anesthesiologists' Classification of Physical Status**

- P1. A normal healthy patient
- P2. A patient with mild systemic disease
- P3. A patient with severe systemic disease
- P4. A patient with severe systemic disease that is a constant threat to life
- P5. A moribund patient who is not expected to survive without the operation
- P6. A declared brain-dead patient whose organs are being removed for donor purposes

Reproduced with permission from the American Society of Anesthesiologists.
