# Supplementary material
Source: PubMed Central journal article supplement (PMC7222867)
Supplement: 12630_2019_1507_MOESM7_ESM.pdf [file 12630_2019_1507_MOESM7_ESM.pdf]

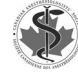

## ANNEXE 2

### **Classification de l'état de santé des patients, selon l'American Society of Anesthesiologists**

- P1. Patient en bonne santé
- P2. Patient atteint d'une maladie systémique légère
- P3. Patient atteint d'une maladie systémique grave
- P4. Patient atteint d'une maladie systémique grave, qui représente un danger constant pour sa vie
- P5. Patient moribond dont on ne s'attend pas à ce qu'il survive sans l'intervention chirurgicale
- P6. Patient déclaré en mort cérébrale dont les organes sont prélevés pour fins de don d'organes

Avec la permission de l'American Society of Anesthesiologists.
