# Supplementary material
Source: PubMed Central journal article supplement (PMC7222867)
Supplement: 12630_2019_1507_MOESM8_ESM.pdf [file 12630_2019_1507_MOESM8_ESM.pdf]

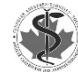

### ANNEXE 3

#### Liste de vérification préanesthésique

En raison de l'apparition de stations d'anesthésie modernes et électroniques, il est reconnu qu'une recommandation de contrôle unique ne s'applique pas à tous les stations. En effet, non seulement la conception de l'équipement diffère, mais les procédures de vérification automatisées intégrées dans ces stations peuvent ou non vérifier tous les éléments auxquels il faut porter attention.

Par conséquent, les directives ci-dessous décrivent les éléments à vérifier avant l'utilisation d'un appareil d'anesthésie, plutôt que la manière dont chaque élément devrait être vérifié. La liste de contrôle à utiliser dépend du matériel à vérifier et des ressources disponibles dans un site spécifique où l'on pratique l'anesthésie. Les départements d'anesthésie devraient envisager l'élaboration de listes de contrôle adaptées aux appareils qu'ils utilisent dans leur département. Au fur et à mesure de l'adoption de nouveaux appareils d'anesthésie, des procédures de contrôle révisées devront être mises au point.

TABLEAU 1 Procédure de vérification préanesthésique : **Vérification à effectuer quotidiennement, ou à chaque fois qu'une machine est déplacée ou des vaporisateurs remplacés**

|                                                                                                                                                                                                                                                                                         |
|-----------------------------------------------------------------------------------------------------------------------------------------------------------------------------------------------------------------------------------------------------------------------------------------|
| Vérifier la disponibilité du matériel spécial (défibrillateur, médicaments d'urgence, trousse pour l'intubation difficile, trousse pour l'hyperthermie maligne, dispositif portable de distribution d'oxygène).                                                                         |
| Confirmer que le réseau électrique (CA) est disponible et que la station d'anesthésie est alimentée par du courant alternatif.                                                                                                                                                          |
| Compléter et confirmer la réussite des systèmes de vérification interne des stations électroniques d'anesthésie.                                                                                                                                                                        |
| Vérifier que la pression est suffisante dans le cylindre de réserve d'oxygène installé sur la station d'anesthésie et qu'un appareil de ventilation manuel (ballon de réanimation autogonflable manuel) est disponible et fonctionnel.                                                  |
| Vérifier que les pressions des gaz dans les tuyaux sont $\geq 47$ psi.                                                                                                                                                                                                                  |
| Vérifier qu'il n'y a pas de fuite dans les lignes de distribution des gaz entre les débitmètres et la sortie de gaz frais.<br>Remarque : dans les appareils d'anesthésie électroniques, le processus d'auto-vérification interne du système se charge en général de cette vérification. |
| S'assurer que le système de récupération des gaz anesthésiques résiduels fonctionne correctement.                                                                                                                                                                                       |
| Calibrer, ou vérifier l'étalonnage du moniteur d'oxygène et vérifier l'alarme signalant une faible quantité d'oxygène. Calibrer ou vérifier l'étalonnage du capnomètre et des analyseurs d'agents anesthésiques.                                                                        |
| Noter que les procédures de vérification ont été réalisées.                                                                                                                                                                                                                             |

**TABLEAU 2 Procédure de vérification préanesthésique : Vérification à effectuer quotidiennement ET avant chaque intervention d'anesthésie**

|                                                                                                                                                                                                                                                                                                                                                                  |
|------------------------------------------------------------------------------------------------------------------------------------------------------------------------------------------------------------------------------------------------------------------------------------------------------------------------------------------------------------------|
| Vérifier la disponibilité du matériel de base : (voies aériennes : laryngoscope fonctionnel avec réserve disponible, tubes trachéaux adaptés, canules oropharyngées adaptées, mandrin, pinces de Magill, autre matériel adapté de prise en charge des voies aériennes) (médicaments : de base et pour la réanimation) (matériel et solutions pour accès veineux) |
| Vérifier que le matériel de succion pour le patient est immédiatement disponible et adapté pour libérer les voies aériennes.                                                                                                                                                                                                                                     |
| Vérifier la disponibilité des moniteurs nécessaires, y compris les alarmes. S'assurer que les alarmes sont branchées, que les limites sont bien réglées et que le son est suffisamment fort.                                                                                                                                                                     |
| Vérifier que les vaporisateurs sont suffisamment remplis et, le cas échéant, que les ports de remplissage sont bien fermés.                                                                                                                                                                                                                                      |
| Vérifier que l'absorbant de dioxyde de carbone n'est pas épuisé.                                                                                                                                                                                                                                                                                                 |
| Vérifier la pression du système de ventilation et de détection des fuites.                                                                                                                                                                                                                                                                                       |
| Vérifier que les gaz circulent correctement dans le circuit de ventilation pendant l'inspiration et l'expiration.                                                                                                                                                                                                                                                |
| Noter que les procédures de vérification ont été réalisées.                                                                                                                                                                                                                                                                                                      |
| Confirmer les réglages du ventilateur et évaluer la disponibilité à fournir des soins d'anesthésie (section de briefing de la Liste de contrôle de la sécurité chirurgicale).                                                                                                                                                                                    |

Basé sur les Recommandations 2008 de l'ASA pour la vérification préanesthésique de l'*American Society of Anesthesiologists*. Un exemplaire du texte complet peut être obtenu de l'ASA, 520 N. Northwest Highway, Park Ridge, Illinois 60068-2573 USA.
