# Supplementary material
Source: PubMed Central journal article supplement (PMC7222867)
Supplement: 12630_2019_1507_MOESM9_ESM.pdf [file 12630_2019_1507_MOESM9_ESM.pdf]

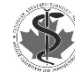

## ANNEXE 5

### **Exposé de principe sur les assistants en anesthésie : exposé de principe officiel de la Société canadienne des anesthésiologistes**

#### Contexte

Alors que le nombre et la gravité des comorbidités se multiplient, les soins médicaux et chirurgicaux sont devenus de plus en plus complexes. En même temps, la pratique de l'anesthésiologie a réalisé de grands progrès suite aux développements dans l'éducation et la formation des anesthésiologistes, à une base de connaissances et de données élargie, et à de remarquables innovations dans l'équipement, la technologie et la pharmacothérapie. Il est aujourd'hui fréquent de retrouver des services d'anesthésie hors de la salle d'opération (SO), où le besoin de soins spécialisés pour pratiquer des interventions diagnostiques et thérapeutiques augmente également. Ce fardeau clinique croissant met au défi la capacité des anesthésiologistes à répondre aux besoins sociétaux, tant en matière de soins cliniques que de productivité universitaire. La Société canadienne des anesthésiologistes (SCA) a pour mission d'améliorer la qualité des soins des patients tout en améliorant l'efficacité des anesthésiologistes. La SCA accueille favorablement l'ajout de professionnels de la santé compétents et bien formés travaillant dans le cadre d'une équipe interprofessionnelle responsable de fournir des soins périopératoires en anesthésie.

#### Prémisses

- Au Canada, l'anesthésiologie est pratiquée par des médecins spécialistes ayant été formés par des universités accréditées, et certifiés via le processus de certification reconnu au niveau national du Collège royal des médecins et chirurgiens du Canada (CRMCC).
- Les personnes travaillant comme assistants en anesthésie (AA) sont des professionnels de la santé bénéficiant d'une expérience optimale et qui ont poursuivi, pendant une période déterminée, une formation pédagogique et clinique spécifique pour acquérir les compétences requises afin de travailler comme AA. Au Canada, leur formation les autorise à travailler spécifiquement comme AA. Les AA exécutent des ordonnances médicales et des directives selon les instructions données par les anesthésiologistes.
- Les assistants en anesthésie travaillent sous la supervision directe d'un anesthésiologiste spécialisé.
- Les personnes offrant une assistance exclusivement technique en anesthésie opératoire et qui n'ont pas suivi une formation pédagogique et clinique spécifique à l'anesthésie, telle que définie sous la section « Éducation et formation des assistants en anesthésie », ne doivent pas être désignées comme AA. Le personnel technique en anesthésie travaille sous la direction et la supervision des anesthésiologistes et/ou d'un AA, et ces personnes sont souvent appelées « techniciens en anesthésie ».

- Un modèle d'équipe de soins en anesthésie (ESA) existe déjà depuis plusieurs années au Québec, où les AA pratiquent en tant que professionnels de la santé régis par un statut légal clairement défini dans le Code des professions.
- Au Manitoba, il existe un modèle « d'assistants cliniques en anesthésie » (Cl.A), une profession régie par le Collège des médecins et chirurgiens du Manitoba, et dont la formation est établie par le Collège de médecine de l'Université du Manitoba.
- Ailleurs au Canada, diverses institutions emploient des personnes en qualité 'd'assistants en anesthésie' ou de 'techniciens en anesthésie'; ces personnes ont en général atteint ce poste en passant par différentes filières de formation. Plusieurs collèges proposent des programmes de formation d'AA, mais il n'existe pas de programme de formation national ni d'organisme de certification.
- Aux États-Unis, divers assistants médicaux remplissent des fonctions semblables au modèle d'AA décrit ici. Toutefois, les modèles de soins anesthésiques aux États-Unis sont nombreux; une comparaison directe avec les rôles canadiens est donc difficile.
- Au Royaume-Uni, la fonction de « praticien du département opératoire » (*Operating Department Practitioner*, ou ODP, une appellation protégée) est régie par le Conseil britannique des professions de la santé et des soins. Ce praticien travaille comme assistant en SO et dans d'autres zones de soins critiques où il remplit diverses fonctions, dont certaines où il assiste spécifiquement l'anesthésiologiste. La formation se fait par un programme de diplôme offert dans plusieurs universités. Plus récemment, le Collège royal [britannique] des anesthésistes a parrainé la création d'une formation d'ODP spécialisé en soins anesthésiques, le 'praticien en soins anesthésiques' ou 'assistant du médecin en anesthésie' (*Anesthetic Care Practitioner* et *Physicians Assistant Anesthesia*, respectivement).
- L'Australie et la Nouvelle-Zélande ont rendu obligatoire la présence d'un assistant spécialement formé au service de l'anesthésiste pendant la conduite de l'anesthésie. Cette fonction a récemment été passée en revue par le Collège des anesthésistes d'Australie et de Nouvelle-Zélande, qui a publié des recommandations selon lesquelles « *tous les assistants étant des praticiens enregistrés auprès des organismes de régulation pertinents* », dans un processus qui ressemble à celui en cours au Canada.

## Principes de base

Le « Guide d'exercice de l'anesthésie » (2015) spécifie que : « *L'exercice indépendant de l'anesthésie est un domaine spécialisé de la médecine. Par conséquent, cette spécialité devrait être pratiquée par des médecins ayant reçu une formation adéquate en anesthésie.* » Ceci étant dit, tout comme les caractéristiques démographiques du public canadien ont changé, les patients se présentant pour recevoir des soins médicaux ont eux aussi changé, ainsi que les attentes en matière de soins. Le modèle relativement simple des soins anesthésiques défini il y a 40 ans a évolué de concert avec ces changements. La SCA reconnaît que des soins optimaux ne sont plus prodigués par des praticiens travaillant seuls, mais que le modèle de soins se fonde désormais sur une équipe de « soins aux patients », laquelle englobe le système entier de professionnels offrant des soins aux patients. Dans ce nouveau modèle, la SCA appuie la mise au point du concept de soins de « l'équipe de soins en anesthésie », dans laquelle l'anesthésiologiste spécialisé pratique avec l'aide d'un groupe de professionnels médicaux et paramédicaux, y compris des assistants en anesthésie dévoués, formés et accrédités. Afin de garantir la sécurité des patients et la fourniture optimale de soins aux patients en période périopératoire, il est essentiel que la pratique de l'anesthésie demeure une responsabilité médicale.

Nous savons que notre tradition d'excellence en soins, qui veut que chaque patient soit exclusivement pris en charge par un anesthésiologiste, a ses limites. Dans ce *Guide d'exercice de l'anesthésie*, nous reconnaissons que certaines circonstances spécifiques sont propices à l'implantation d'un modèle 'd'équipe de soins en anesthésie'. Selon le *Guide*, « *il peut être admis, dans des circonstances particulières, qu'un anesthésiologiste supervise plus d'un cas dans lequel seule une sédation de 1-3 sur l'échelle de Ramsay est administrée, à condition qu'une personne ayant reçu une formation adéquate, qualifiée, accréditée et approuvée par l'établissement de santé, soit constamment présente auprès de chaque patient recevant des soins.* » En ce qui touche aux soins anesthésiques pour l'obstétrique, notre *Guide* spécifie : « *Sous la direction d'un anesthésiologiste, certains aspects de la surveillance et de la prise en charge de l'analgésie régionale obstétricale peuvent être délégués à d'autres professionnels de la santé. Chaque établissement doit s'assurer que ces personnes reçoivent la même formation, accréditation, formation continue et ré-accréditation en analgésie régionale obstétricale.* » Toutefois, il souligne que « *L'administration simultanée d'une anesthésie générale, rachidienne, péridurale ou autre anesthésie locorégionale majeure ou d'une sédation de niveau 4-6 (échelle de sédation de Ramsay, voir Annexe 6) par un anesthésiologiste pour des interventions diagnostiques ou thérapeutiques pratiquées sur plus d'un patient à la fois est inacceptable.* » La SCA et les anesthésiologistes canadiens sont fiers de leurs normes de soins cliniques élevées et de leur réputation de prodiguer des soins sécuritaires en anesthésie, et ces changements n'ont pas pour but de mettre en péril ce principe.

L'introduction des AA dans l'ESA et l'étendue de leurs activités cliniques doivent demeurer sous la responsabilité directe des anesthésiologistes, plus spécifiquement du directeur du département d'anesthésiologie (le cas échéant), tant au niveau de la clinique et de l'hôpital qu'aux paliers régional et/ou provincial.

#### Formation et programme d'études des assistants en anesthésie

La SCA reconnaît que les programmes de formation actuels des assistants en anesthésie accueillent et forment des professionnels ayant reçu des formations diverses. Le parcours à suivre avant d'accéder à la formation d'assistant en anesthésie devrait être défini par les établissements de formation des AA et des organismes consultants. Le programme d'études devrait couvrir les domaines pertinents de la physiologie, de la pharmacologie ainsi que les aspects techniques et professionnels de la pratique d'assistant en anesthésie. La formation clinique en soins anesthésiques devrait être conforme aux objectifs de formation existants et pourrait, à l'avenir, être un programme fondé sur les compétences. Les organismes de régulation dans les provinces accréditant les AA à l'heure actuelle, ainsi que d'autres organismes, notamment la Société canadienne des thérapeutes respiratoires (SCTR), l'Ordre Professionnel des Inhalothérapeutes du Québec (OPIQ), l'Association des infirmières et infirmiers de salle d'opération du Canada (AIISOC), l'Association nationale des infirmières et infirmiers périanesthésiques du Canada (ANIPAc), et l'Association des infirmières et infirmiers du Canada (AIIC) devraient adopter une approche collaborative avec la SCA afin de définir les compétences, la formation et l'éducation et, ultimement, l'accréditation et la certification des assistants en anesthésie au niveau national.

Les anesthésiologistes, de concert avec les autres personnes responsables de la formation des assistants en anesthésie, doivent être impliqués dans la conception du programme d'études, le contenu des cours, l'enseignement et l'évaluation des assistants en anesthésie en formation. Des liens directs entre les programmes de formation des AA, la SCA et l'Association des

départements d'anesthésie des universités canadiennes faciliteront ce processus. Toutes les parties impliquées doivent avoir l'occasion de donner leur avis à propos des programmes de formation des AA de façon régulière, afin de garantir que le contenu du programme d'études et la façon dont les matières sont enseignées respectent les normes de formation actuelles et couvrent le champ d'activité des AA.

## Rôles et responsabilités

Les anesthésiologistes sont impliqués dans les soins pré-, per- et postopératoires du patient. Pendant chaque phase de la période périopératoire, les anesthésiologistes sont assistés par des professionnels de la santé dévoués et hautement qualifiés. Les assistants en anesthésie, tels que définis par la formation et les rôles décrits dans ce document, sont des professionnels spécialement formés dont l'activité se concentre spécifiquement sur une assistance à l'anesthésiologiste dans la prestation des soins aux patients pendant la période périopératoire.

## Tâches techniques

L'assistant en anesthésie devra :

1. Mettre en place, vérifier, calibrer et actionner les moniteurs physiologiques tels que les stations d'anesthésie, les dispositifs d'intubation ou de maintien des voies aériennes, les fibroscopes, les moniteurs de l'état physiologique et le matériel de perfusion.
  - Effectuer les vérifications requises de l'équipement tel qu'indiqué et tenir à jour des registres des problèmes afin d'assurer le fonctionnement sécuritaire de l'équipement.
  - Remplacer et changer les fournitures du matériel anesthésique conformément à un programme d'entretien de routine.
  - Maintenir l'approvisionnement de médicaments et du matériel des stations d'anesthésie.
2. Détecter les pannes des appareils d'anesthésie.
  - Corriger les problèmes découverts et/ou assurer le suivi avec les techniciens en génie biomédical ou les préposés du service.
3. Surveiller les niveaux de pollution liés aux traces de gaz.
4. Vérifier et maintenir l'approvisionnement des chariots pédiatriques, d'intubation difficile, d'hémodynamie et d'hyperthermie maligne.
5. Participer au programme de prévention des infections en salle d'opération en accomplissant des tâches comme le maintien de la propreté des appareils d'anesthésie conformément aux programmes d'assurance de la qualité. Maintenir, selon les procédures établies, des mesures pour minimiser la pollution en salle d'opération.

## Tâches cliniques

L'assistant en anesthésie devra :

1. Aider dans toutes les facettes du plan de soins anesthésiques formulé spécifiquement pour chaque patient. Cette tâche comprend l'optimisation préopératoire, l'induction et le maintien de l'anesthésie. Aider à ajuster les niveaux d'anesthésie, à administrer des traitements adjuvants, lors du réveil et à garantir la continuité des soins jusqu'à et au cours de la période postopératoire.
2. Aider à la préparation du patient en vue de la chirurgie et effectuer les évaluations préopératoires à la demande de l'anesthésiologiste.
3. Effectuer ou aider à l'insertion de dispositifs comme les sondes oro- ou nasogastriques, les perfusions intraveineuses et les cathéters intra-artériels.

4. Aider à l'insertion de cathéters de l'artère pulmonaire et de cathéters veineux centraux.
5. Aider à la réalisation de l'échocardiographie transœsophagienne, de l'échocardiographie transthoracique et de toute autre échographie.
6. Aider durant les interventions d'anesthésie régionale, y compris en réalisant l'échographie pour les blocs nerveux.
7. Effectuer ou aider à la prise en charge des voies aériennes, y compris à l'insertion de masques laryngés, à l'intubation trachéale et à la ventilation au masque.
8. Aider au positionnement du patient sous la supervision de l'anesthésiologiste.
9. Ajuster les traitements (par ex. : la ventilation, les appareils de contrôle de la température, etc.) selon les instructions de l'anesthésiologiste.
10. Administrer au patient les agents pharmacologiques prescrits sous la direction de l'anesthésiologiste en charge, en surveillant les effets secondaires et l'efficacité du traitement.
11. Évaluer l'état physiologique du patient pendant l'anesthésie en effectuant des tâches comme la surveillance des signes vitaux et des gaz anesthésiques et en avisant l'anesthésiologiste de l'état du patient.
12. Aider lors de l'émergence de l'anesthésie en accomplissant des tâches telles qu'aspirer les sécrétions de la trachée et du pharynx, retirer les masques laryngés et effectuer l'extubation trachéale du patient. Enlever l'équipement de surveillance après la chirurgie.
13. Aider au transfert des patients ventilés et/ou sous anesthésie entre les différents secteurs de l'hôpital, tel que requis.
14. Transférer les patients en phase postopératoire à la salle de réveil sous la direction de l'anesthésiologiste.
15. Surveiller l'évolution des patients en salle de réveil, maintenir à jour le dossier anesthésique et informer, lorsque requis, l'anesthésiologiste de l'état du patient, en collaboration avec le personnel de la salle de réveil.
16. Fournir des données diagnostiques à l'anesthésiologiste en accomplissant des tâches telles que les analyses et les prélèvements sanguins, les tests de fonction pulmonaire, le monitoring du CO<sub>2</sub> télé-expiratoire, l'oxymétrie de pouls et le monitoring transcutané.
17. Préparer les bronchoscopes à fibre optique et tout autre équipement tel que requis, et assister l'anesthésiologiste pendant la bronchoscopie par la mise en place de l'équipement, la préparation et l'instillation de médicaments et la collecte des échantillons.
18. Assister l'anesthésiologiste lors d'une intubation difficile.
19. Assister l'anesthésiologiste pour les cas réalisés hors de la salle d'opération.
20. Répondre aux arrêts cardiaques survenant en salle d'opération, en salle de réveil et dans d'autres endroits selon les procédures et les politiques de l'hôpital.
21. Procéder à la réanimation initiale dans les situations potentiellement fatales selon les protocoles établis (c.-à-d. Soins immédiats en réanimation/Soins avancés en réanimation cardiovasculaire, Hyperthermie maligne, Programme de réanimation néonatale, et Soins avancés en réanimation pédiatrique) en attendant l'arrivée de l'anesthésiologiste en charge.
22. Évaluer et surveiller les patients et administrer des médicaments pour la sédation consciente comme le définit le *Guide* de la SCA.
23. Assister / réaliser l'administration de transfusions massives de produits sanguins selon les protocoles de l'établissement.

Tâches administratives

L'assistant en anesthésie devra :

1. Conjointement avec les départements d'anesthésiologie et de génie biomédical, veiller à l'entretien de divers appareils d'anesthésie par l'accomplissement de tâches telles que la réception et l'évaluation des appareils, la vérification et l'identification des défauts, et définir si les réparations doivent être faites sur place ou si l'équipement doit être retourné au fournisseur. Effectuer l'entretien mineur selon les recommandations du fabricant et les lignes directrices de l'Association canadienne de normalisation et vérifier les réparations du fournisseur afin de garantir que l'équipement fonctionne de façon efficace et sécuritaire.
2. Participer à l'évaluation des technologies de la santé, y compris (le cas échéant) rencontrer les représentants de matériel médical et de produits pharmaceutiques afin d'organiser des essais et des évaluations du nouveau matériel et des médicaments nouveaux selon le protocole de l'établissement. Recueillir et compiler les rétroactions et participer aux décisions d'achat.
3. Prendre les dispositions requises et coordonner l'entretien et la réparation du matériel.
4. Contacter et servir de liaison avec les fournisseurs.
5. Tenir à jour l'inventaire des fournitures.
6. S'approvisionner en fournitures et en équipement.
7. Aider le département d'anesthésie en ce qui concerne le budget d'achat d'appareils en effectuant des recherches et des évaluations sur les besoins en appareils.
8. Aider aux activités d'assurance de la qualité et de recherche tel que requis.

#### Formation et initiation

L'assistant en anesthésie devra :

1. Participer à l'initiation des nouveaux employés et des étudiants en salle d'opération et en salle de réveil.
2. Participer à l'enseignement aux étudiants.
3. Participer aux séances de perfectionnement destinées au personnel infirmier et aux médecins concernant les nouveaux appareils et fournitures.
4. Assister à des programmes de formation tel que requis afin de maintenir ses compétences pratiques.

#### Rôles et responsabilités des assistants techniques en anesthésie

Comme cela est stipulé plus haut, les assistants techniques en anesthésie assistent les anesthésiologistes dans les soins d'anesthésie opératoire, y compris dans les salles d'opération et autres endroits où l'anesthésie est pratiquée.

1. Leurs tâches sont techniques et, en général, semblables à celles décrites ci-dessus au point 'Tâches techniques' de la section Rôle et responsabilités des assistants en anesthésie;
2. Après une formation en cours d'emploi, et avec le consentement du directeur du département d'anesthésiologie, ces employés remplissent les tâches techniques conformément à leur niveau de compétence et à leur accréditation;
3. Leurs rôles et responsabilités sont définis et supervisés par le directeur du département d'anesthésiologie.
