# Supplementary material
Source: PubMed Central journal article supplement (PMC7222867)
Supplement: 12630_2019_1507_MOESM10_ESM.pdf [file 12630_2019_1507_MOESM10_ESM.pdf]

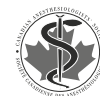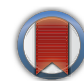

## Procedural sedation: a position paper of the Canadian Anesthesiologists' Society

**Gregory Dobson, MD · Matthew A. Chong, MD · Lorraine Chow, MD · Alana Flexman, MD · Heather Hurdle, MD · Matthew Kurrek, MD · Claude Laflamme, MD · Michel-Antoine Perrault, MD · Kathryn Sparrow, MD · Shean Stacey, MD · Petrus A. Swart, MD · Michael Wong, MD**

Received: 30 July 2018 / Accepted: 30 July 2018  
© Canadian Anesthesiologists' Society 2018

The Canadian Anesthesiologists' Society (CAS) promotes safe anesthesia care to the highest possible standard. Traditionally, this care was provided in operating rooms by anesthesiologists. Contemporary practice, however, includes many other care locations and providers. Nevertheless, requirements for assessing the patient and managing the medical intervention are independent of provider or location.

Procedural sedation is defined as the technique of safely administering short-acting sedative or dissociative agents, with or without analgesics, to reduce discomfort, apprehension, and potentially unpleasant memories while

minimizing cardiorespiratory depression of patients during diagnostic and therapeutic procedures. These effects are distinct from both general anesthesia, which provides a state of total unconsciousness, and analgesia alone, which delivers a reduction in or insensibility to pain, not necessarily with a reduction in or a loss of consciousness. Some use of analgesic medication is common for procedural sedation. The larger doses necessary for very painful procedures may be hazardous, however, and other options may need to be considered, such as general anesthesia.

Recognizing that adverse events are not uncommon with procedural sedation, the sedation provider must practice careful patient selection and complete a thorough pre-procedural assessment. These providers must also be vigilant and prepared to deal with potential complications, such as respiratory depression, airway obstruction, and hypoxemia. Importantly, outside the

---

This article is accompanied by an editorial. Please see *Can J Anesth* 2018; 65: this issue.

---

Cet article est accompagné d'un éditorial. Veuillez vous référer à *Can J Anesth* 2018; 65 : ce numéro.

---

G. Dobson, MD (✉) · M. Wong, MD  
Department of Anesthesiology, Dalhousie University, Halifax,  
NS, Canada  
e-mail: G.Dobson@dal.ca

M. A. Chong, MD  
Department of Anesthesiology, University of Western Ontario,  
London, ON, Canada

L. Chow, MD · H. Hurdle, MD · S. Stacey, MD  
Department of Anesthesiology, University of Calgary, Calgary,  
AB, Canada

A. Flexman, MD · P. A. Swart, MD  
Department of Anesthesiology, Vancouver General Hospital,  
Vancouver, BC, Canada

M. Kurrek, MD  
Department of Anesthesiology, University of Toronto, Toronto,  
ON, Canada

C. Laflamme, MD  
Department of Anesthesiology, Sunnybrook Health Sciences  
Centre, Toronto, ON, Canada

M.-A. Perrault, MD  
Department of Anesthesiology, University of Sherbrooke,  
Sherbrooke, QC, Canada

K. Sparrow, MD  
Department of Anesthesiology, Memorial University, St. John's,  
NL, Canada

operating room, these complications may be associated with a higher risk of morbidity and mortality. Although high quality studies comparing outcomes in the operating room with those in locations outside of the operating room are lacking,<sup>1</sup> US closed claims data have shown that complication rates and adverse outcomes are higher when anesthesia care, including procedural sedation, is delivered in remote locations.<sup>2</sup>

This position paper describes best practices and establishes guidelines applicable to anesthesiologists and anesthesia care teams for administering safe procedural sedation both within and outside the operating room, including out-of-hospital facilities. It also recognizes that many medical and dental professionals are presently providing sedation services. Recent Canadian closed claims data for all sedation providers have identified that serious adverse events and patient harm related to procedural sedation do occur, even in the hands of experienced anesthesiologists.<sup>3</sup> Contributing factors include inadequate assessment, medication selection, lack of situational awareness, and deficiencies in procedural and post-procedural monitoring with failure to recognize airway and respiratory compromise. Formal curricula with a demonstration of competency in procedural sedation have been recommended as an essential component of anesthesia training programs.<sup>4</sup>

The principles outlined in this document can also be applied by non-anesthesia sedation providers, although such professionals may wish to evaluate their compliance in accordance with their own professional guidelines or those of the healthcare facility. The CAS strongly advocates that all sedation providers be held to a comparably rigorous and prudent set of guidelines but also acknowledges that some differences in practice may exist between anesthesia and non-anesthesia sedation providers. We strongly recommend that, within a specific institution, consideration be given to developing procedural sedation guidelines or policies, ideally through a multi-disciplinary committee representative of all sedation

providers and stakeholders, including anesthesiologists.<sup>5</sup> Anesthesiologists are experts in delivering safe procedural sedation, and anesthesia departments should therefore, to the extent that their resources permit, endeavor to provide planned and emergency sedation services to the facility. Anesthesiologists should encourage upholding the highest possible institutional sedation standards and, again, as resources permit, support the education of sedation providers and sedation assistants throughout their facility. The concept of facility sedation teams, often led by anesthesiology, is growing in popularity, particularly for the delivery of pediatric sedation services,<sup>6</sup> as they have the benefit of increasing the availability and mobility of sedation services as well as promoting ongoing education and skill acquisition of team members.

### Levels of sedation

The American Society of Anesthesiologists' (ASA) Continuum of Depth of Sedation has become widely accepted as a useful tool to standardize the definition of levels of sedation and the American Academy of Pediatrics and the Joint Commission on Accreditation of Healthcare Organizations have together sanctioned the use of the ASA Continuum.<sup>7</sup> The continuum defines three distinct levels of sedation, described as minimal, moderate, and deep. It also acknowledges that a patient may readily pass from a state of minimal sedation to deep sedation and even to a fourth level (i.e., general anesthesia). Good clinical correlates are required to enhance the precision and reproducibility of any level of sedation measurement system.

The ASA sedation continuum describes in very specific terms the characteristics of each level of sedation as summarized in Table 1.<sup>8</sup> The term "conscious sedation," which was often used in the past, roughly correlates with moderate sedation. The term is no longer recommended. The transition between having and then losing constant

**Table 1** The American Society of Anesthesiologists Continuum of Depth of Sedation

|                         | Minimal sedation /<br>anxiolysis      | Moderate sedation / analgesia<br>("conscious sedation") | Deep sedation/analgesia                                       | General anesthesia                                    |
|-------------------------|---------------------------------------|---------------------------------------------------------|---------------------------------------------------------------|-------------------------------------------------------|
| Responsiveness          | Normal response to verbal stimulation | Purposeful response to verbal or tactile stimulation    | Purposeful response following repeated or painful stimulation | Unarousable even with repeated or painful stimulation |
| Airway                  | Unaffected                            | No intervention required                                | Intervention may be required                                  | Intervention often required                           |
| Spontaneous ventilation | Unaffected                            | Adequate                                                | May be inadequate                                             | Frequently inadequate                                 |
| Cardiovascular function | Unaffected                            | Usually maintained                                      | Usually maintained                                            | May be impaired                                       |

Adapted with permission from: *American Society of Anesthesiologists*. Continuum of Depth of Sedation. Available from URL: <http://www.asahq.org/~media/sites/asahq/files/public/resources/standards-guidelines/continuum-of-depth-of-sedation-definition-of-general-anesthesia-and-levels-of-sedation-analgesia.pdf>.<sup>8</sup>

verbal contact with the patient occurs between moderate and deep sedation. This transition point is an important observation to monitor that is not specifically mentioned in the ASA continuum. Reflex withdrawal from a painful stimulus should not be considered “purposeful”. Many other sedation “scales” (e.g., Ramsay) exist and are more commonly used by non-anesthesiologist providers.<sup>7</sup> These scales are useful but must take these definitions into account when assigning a number to the depth of sedation.

### Pre-procedural assessment

Providing potent medications by parenteral routes requires assessment of the patient and administration by a physician or other health professional, such as a delegated anesthesia assistant or registered nurse with specific training and experience in providing procedural sedation. The assessment must include documenting an appropriate medical and surgical history, identifying relevant medical co-morbidities, patient medications and allergies, and the indications for the procedure. A focused physical examination and any relevant investigations must also be performed. The nature of the procedural sedation, any significant risks, and possible alternatives must be discussed with the patient and must be documented in the health record.

Screening for obstructive sleep apnea (OSA) using validated screening tools, such as the STOP-Bang Questionnaire,<sup>9</sup> is recommended. If the patient is at risk of, or confirmed to have, moderate to severe OSA, procedural sedation may carry with it an increased risk and should be modified accordingly.<sup>10</sup>

### Physical examination

The physical examination must be appropriate to the medical co-morbidities of the patient. It must include a thorough assessment of the patient’s airway, including predictors of difficult bag-mask ventilation and endotracheal intubation, in view of the potential for respiratory depression and compromised airway maintenance during procedural sedation. The airway assessment must be formally documented in the health record.

### Management of sedation and patient monitoring

General guidelines for procedural sedation are the same as those for other forms of anesthesia and are consistent with those outlined in the *CAS Guidelines to the Practice of*

*Anesthesia*.<sup>11</sup> The CAS practice guidelines state that it is unacceptable for a single physician to administer an anesthetic, including deep procedural sedation, and simultaneously perform a diagnostic or therapeutic procedure, except for procedures done with only infiltration of local anesthetic and/or minimal sedation.

Heart rate, blood pressure, respiratory rate, oxygen saturation, and the level of sedation/consciousness must be monitored and documented for all patients undergoing procedural sedation. Oxygen saturation monitoring (i.e., pulse oximetry) must be continuous and recorded at regular intervals along with other vital signs. For minimally invasive procedures in suitable patients without significant cardiorespiratory disease, the usual *CAS Guidelines* requirement for electrocardiographic monitoring may be waived if continuous pulse oximetry is used and only minimal to moderate sedation is employed.

Waveform capnography is required for patients expected to require moderate or deep procedural sedation (see Capnography section). It is strongly recommended that, in addition to the continuous observation of clinical signs, the rate and quality of ventilation be monitored and documented routinely with waveform capnography for all patients during procedural sedation.

Routine administration of supplemental oxygen by nasal cannula or high-flow face mask is strongly recommended for all patients undergoing procedural sedation and is required for deep sedation. Appropriate precautions should be taken to minimize the risk of fire in the procedure room due to the enriched atmosphere that may be created by using supplemental oxygen, particularly for procedures around the head and neck.

Clinical studies have shown that the level of sedation may become deeper than intended.<sup>12</sup> Therefore, appropriate equipment must be readily available and functioning to manage patients who develop significant cardiorespiratory depression. The following equipment (in various sizes according to the patient population served by the institution) should be available:

- Airway equipment and other recommended resources
  - Self-inflating bag ventilator and face masks
  - Laryngoscope handle and blades
  - Supraglottic airway devices
  - Access to difficult airway management equipment, such as (but not restricted to) intubating stylets, bougies, airway exchange catheters, and video laryngoscopes, as appropriate for the specific facility and case mix
  - Oropharyngeal and nasopharyngeal airways

- Endotracheal tubes with a cuff inflation syringe and cuff pressure manometer
  - Adhesive tape and other supplies to secure an endotracheal tube
  - Stethoscope
  - Hospital-grade suction and appropriate cannulas and catheters
  - A dedicated oxygen source, nasal cannula, and oxygen face masks
  - End-tidal carbon dioxide monitoring equipment is required for moderate or deep sedation (see Capnography section)
  - Cricothyroidotomy kit
- Vascular access
  - Equipment and expertise to achieve intravenous access
- Medications
    - Antagonists for sedative agents, where appropriate (e.g., flumazenil, naloxone)
    - Resuscitation drugs (e.g., epinephrine, vasopressin, atropine)
  - Emergency equipment
    - Defibrillator, cardiac arrest cart with Advanced Cardiovascular Life Support (ACLS) cognitive aids

The precise requirements for pre-procedural fasting are evolving. In general, patients provided with moderate or deep sedation should fast in accordance with the general *CAS Guidelines*:

- Eight hours after a meal that includes meat, fried, or fatty foods.
- Six hours after a light meal, infant formula, or non-human milk.
- Four hours after ingestion of unfortified breast milk.
- Two hours after clear fluids.

More liberal guidelines may be appropriate for minimal sedation (e.g., cataract surgery). Nevertheless, they should be individualized, and providers should exercise caution in view of the patient's specific co-morbidities and risk factors for pulmonary aspiration of gastric contents.

Any health professional employing sedative-hypnotic agents to provide sedation must have the expertise, experience, equipment, and other resources available to resuscitate patients. Accordingly, ACLS certification is strongly recommended. They must be able to provide advanced airway management and to “rescue” patients

who become more deeply sedated than intended and develop respiratory depression or apnea.<sup>13</sup> Failure to respond quickly and appropriately in such circumstances may result in life-threatening complications, such as hypoxic brain injury, pulmonary aspiration of gastric contents, and cardiac arrest.

### Capnography

The *CAS Guidelines* state that continuous monitoring of end-tidal carbon dioxide (waveform capnography) is mandatory during general anesthesia and for moderate or deep procedural sedation. Several studies have shown that the ability to detect respiratory depression during procedural sedation is significantly enhanced when capnography monitoring is utilized.<sup>14</sup> For minimal sedation, capnography may be a useful adjunct to detect progression to an unintended deeper level of sedation with associated respiratory depression and is therefore recommended. Capnography is useful in monitoring patient ventilation when it cannot be directly observed (e.g., during magnetic resonance imaging), when multiple sedative agents are utilized, and when the pre-procedural assessment identifies an increased clinical risk for respiratory depression or airway obstruction (e.g., morbid obesity, OSA).

### Provision of sedation and delegation

Sedation may be provided by a team that includes a sedation supervisor (typically the anesthesiologist/physician) and an approved and credentialed sedation assistant(s) (e.g., registered nurse, respiratory therapist, anesthesia assistant, or other appropriately trained health professional). The department of anesthesiology must define the specific qualifications, roles, and responsibilities of the sedation assistant. The sedation team may work together to conduct the sedation by performing the discrete tasks of 1) assessing the patient, 2) providing the sedation, and 3) monitoring the patient.

For minimal to moderate levels of sedation in a stable patient:

- The sedation supervisor may delegate administration of sedation and patient monitoring to the sedation assistant.
- The sedation assistant must remain in constant attendance with the patient, providing continuous monitoring and immediately informing the sedation supervisor of any concerns.

- A member of the sedation team must monitor the patient continuously.
- The sedation supervisor must remain immediately available to support the sedation assistant as necessary.
- The sedation supervisor (anesthesiologist/physician) retains responsibility for the patient.

For deep sedation:

- The *CAS Guidelines* state that it is unacceptable for one anesthesiologist to conduct or supervise the administration of deep procedural sedation simultaneously for concurrent diagnostic or therapeutic procedures on more than one patient at a time.

### Supervision ratios

In specific circumstances where minimal or moderate sedation is administered, it may be appropriate for an anesthesiologist to supervise more than one patient concurrently while strictly adhering to the principles outlined above. It is essential to re-emphasize that an appropriately trained and credentialed individual must be in constant attendance with each patient receiving care. The attending anesthesiologist must assume medical responsibility for the care of all patients involved in this care model and must be immediately available to attend to any patient when required. Each department of anesthesiology must establish the acceptable number of concurrent patients. Important factors to consider include the intensity and complexity of the caseload, the physical status of the patients, sedation assistant staffing and experience, and any institutional policies and procedures.

### Medications used for procedural sedation

This document does not provide a detailed review of the specific benefits or properties of all available medications used for procedural sedation. Anesthesiologists and anesthesia assistants are familiar with the pharmacology and properties of these agents and are experienced in their use. The CAS does support several fundamental principles that should be applied by all sedation providers in any setting. The overarching principle of procedural sedation is that one should use the minimum intervention possible with due consideration given to the specific procedure and patient. In general, medication should be administered in small divided doses or by continuous infusion titrated to clinical effect, allowing

sufficient time to appreciate the peak depth of sedation achieved and accounting for variations in the amount of pain and procedural stimulation. Knowledge of each medication's time of onset, peak effect, and duration of effect is essential. When multiple medications are utilized, particularly with opioids, it is essential to consider the potential synergistic effects on the level of sedation and the increased risk for respiratory depression. Where feasible, local or regional anesthesia should be strongly considered in addition to sedation for particularly painful procedures. Various combinations of medication can be used to administer procedural sedation and they should ideally be short acting and titratable. Increasingly, the potent sedative-hypnotic agents, specifically propofol, have become popular with both anesthesiologists and non-anesthesiologists to provide excellent moderate or deep procedural sedation with high patient satisfaction rates and a more rapid recovery profile than some other combinations of medication.

When anesthetic agents such as propofol are used for procedural sedation, however, they have a greater potential to produce unintentional general anesthesia, even when carefully administered. All sedation providers using agents such as propofol must have specific training and experience with their use, take all necessary monitoring precautions, and have the equipment and skills immediately available to manage the airway and provide ventilation and cardiovascular support associated with even brief periods of general anesthesia.<sup>15,16</sup>

### Recovery and discharge

Post-procedural care of the sedated patient may be delegated to appropriately trained and qualified individuals. Post-procedural monitoring during the early recovery period is required, as stated in the *CAS Guidelines*, and should include level of consciousness, ventilation, oxygen saturation, heart rate, and blood pressure. The appropriate frequency and duration of monitoring should be determined by the facility's standards, taking into account the length and complexity of the specific procedure, the patient's complexity, and the level of sedation provided. Discharge readiness should be assessed by validated discharge criteria, such as the modified Aldrete score<sup>17</sup> for Phase 1 recovery when discharging a patient from the recovery room to another healthcare institutional location, or the postanesthetic discharge scoring system for Phase 2 recovery<sup>18</sup> when discharging the patient home (Table 2). If the patient is to be discharged home,

**Table 2** The modified Aldrete score and the postanesthetic discharge scoring system (PADSS)

| Modified Aldrete score<br>(Validated for discharge from the recovery room to another healthcare location) | Postanesthetic discharge scoring system (PADSS)<br>(Validated to assess discharge of patients directly home) |
|-----------------------------------------------------------------------------------------------------------|--------------------------------------------------------------------------------------------------------------|
| Respiration                                                                                               | Vital signs (compared with pre-procedural reference values)                                                  |
| Able to take deep breath and cough = 2                                                                    | BP and HR within 20% baseline = 2                                                                            |
| Dyspnea/shallow breathing = 1                                                                             | BP and HR within 20–40% baseline = 1                                                                         |
| Apnea = 0                                                                                                 | BP and HR >40% lower or higher than baseline = 0                                                             |
| SpO <sub>2</sub>                                                                                          | Activity                                                                                                     |
| Maintains >92% on room air = 2                                                                            | Steady gait, no dizziness, or meets preoperative level = 2                                                   |
| Needs supplemental O <sub>2</sub> to maintain                                                             | Requires assistance = 1                                                                                      |
| > 90% = 1                                                                                                 | Unable to ambulate = 0                                                                                       |
| < 90% even with supplemental O <sub>2</sub> = 0                                                           |                                                                                                              |
| Consciousness                                                                                             | Nausea and vomiting                                                                                          |
| Fully awake = 2                                                                                           | Minimal or controlled with oral medication = 2                                                               |
| Arousable on calling = 1                                                                                  | Moderate or controlled with parenteral medication = 1                                                        |
| Not responding = 0                                                                                        | Severe or continues despite treatment = 0                                                                    |
| Circulation (compared with pre-procedural reference values)                                               | Pain                                                                                                         |
| BP $\pm$ 20 mmHg = 2                                                                                      | Minimal or moderate (score 0–3) = 2                                                                          |
| BP $\pm$ 20–50 mmHg = 1                                                                                   | Moderate (score 4–6) = 1                                                                                     |
| BP $\pm$ 50 mmHg = 0                                                                                      | Severe (score 7–10) = 0                                                                                      |
| Activity                                                                                                  | Surgical bleeding                                                                                            |
| Able to move four extremities = 2                                                                         | Minimal or no dressing changes required = 2                                                                  |
| Able to move two extremities = 1                                                                          | Moderate or up to two dressing changes required = 1                                                          |
| Able to move no extremities = 0                                                                           | Severe or more than three dressing changes required = 0                                                      |

Maximum scores = 10. A modified Aldrete score of  $\geq 9$  is considered acceptable for discharge from Phase 1 to Phase 2 recovery and a PADSS score of  $\geq 9$  is considered acceptable for discharge from Phase 2 or directly home following only one phase of recovery. The numerical analogue pain scale (0–10) is recommended for assessing post-procedural pain. BP = blood pressure; HR = heart rate.

Adapted from: *Aldrete JA*. The post-anesthesia recovery score revisited. *J Clin Anesth* 1995; 7: 89-91;<sup>17</sup> and *Chung F, Chan VW, Ong D*. A post-anesthetic discharge scoring system for home readiness after ambulatory surgery. *J Clin Anesth* 1995; 7: 500-6.<sup>18</sup>

the most responsible physician or delegated alternate physician must be available to attend to the patient until the institutionally set standards for discharge are met. Regardless of the level of procedural sedation performed, the discharge procedures for the postanesthetic period should conform to the *CAS Guidelines to the Practice of Anesthesia*.

### Quality assurance

The practice of procedural sedation must undergo the same rigorous scrutiny regarding patient outcomes as is applied for other forms of anesthesia care. A specific mechanism must be established for auditing procedural sedation and documenting any major complications, adverse events, or critical incidents. All critical incidents should be systematically reviewed and include appropriate recommendations for improvement where indicated.

## Sédation procédurale : exposé de principe de la Société canadienne des anesthésiologistes

La Société canadienne des anesthésiologistes (SCA) promeut des soins anesthésiques sécuritaires selon les normes les plus élevées possibles. Traditionnellement, ces soins étaient assurés par les anesthésiologistes dans les salles d'opération. Cependant, la pratique actuelle inclut de nombreux autres environnements et prestataires de soins. Les exigences d'évaluation du patient et de gestion de l'intervention médicale sont néanmoins indépendantes du prestataire ou du site.

La sédation procédurale est définie comme étant la technique permettant d'administrer de manière sécuritaire un sédatif ou des agents dissociatifs à courte durée d'action, avec ou sans analgésiques, dans le but de réduire l'inconfort, l'appréhension et les souvenirs potentiellement déplaisants, tout en minimisant la

dépression cardiorespiratoire chez des patients subissant des procédures diagnostiques ou thérapeutiques. Ces effets sont différents à la fois de l'anesthésie générale qui entraîne un état de perte de conscience totale et de l'analgésie pure qui assure une diminution ou une absence de sensibilité à la douleur sans nécessairement s'accompagner d'une réduction ou d'une perte de la conscience. L'utilisation limitée de médicaments antalgiques est fréquente au cours de la sédation procédurale. Les plus fortes doses nécessaires pour des procédures très douloureuses peuvent être dangereuses et dans ce cas il y a sans doute lieu d'envisager d'autres options, telles que l'anesthésie générale.

Sachant que les effets secondaires ne sont pas rares avec la sédation procédurale, la personne en charge de la sédation doit sélectionner les patients de manière scrupuleuse et effectuer une évaluation complète de ces derniers avant la procédure. Ces prestataires doivent être vigilants et prêts à faire face à des complications potentielles, telles qu'une dépression respiratoire, une obstruction des voies respiratoires et une hypoxémie. Il est important de rappeler qu'en dehors d'une salle d'opération, ces complications peuvent être associées à un risque plus élevé de morbidité et de mortalité. Bien que l'on manque d'études de grande qualité comparant les résultats en salle d'opération à ceux obtenus dans d'autres environnements,<sup>1</sup> des données américaines (États-Unis) sur des cas des plaintes judiciaires résolues ont montré que les taux de complications et d'effets indésirables sont plus élevés quand les soins anesthésiques, y compris la sédation procédurale, sont délivrés dans des environnements isolés.<sup>2</sup>

Cet exposé de principe décrit les meilleures pratiques et établit des lignes directrices s'appliquant aux anesthésiologistes et aux équipes de soins anesthésiques pour l'administration d'une sédation procédurale sécuritaire à la fois dans et en-dehors de la salle d'opération, y compris dans des établissements extérieurs à l'hôpital. Il reconnaît également que de nombreux professionnels médicaux et dentaires fournissent actuellement des services de sédation. Des données canadiennes récentes sur des plaintes judiciaires résolues concernant les différents prestataires de sédation ont identifié que des événements indésirables et des lésions graves des patients en rapport avec une sédation procédurale arrivent effectivement, même entre les mains d'anesthésiologistes expérimentés.<sup>3</sup> Les facteurs contributifs sont, notamment, une évaluation insuffisante, le choix du médicament, l'absence de prise de conscience de la gravité de la situation et les insuffisances de suivi pendant et après la procédure, avec la non-reconnaissance de la détérioration de la ventilation et de l'état des voies respiratoires. Des programmes d'études formelles avec une démonstration de la compétence en matière de sédation

procédurale ont été recommandés comme une composante essentielle des programmes de formation en anesthésie.<sup>4</sup>

Les principes décrits dans ce document peuvent également s'appliquer à des prestataires de sédation non-anesthésiologistes, bien que ces professionnels puissent souhaiter évaluer leur conformité avec leurs propres lignes directrices professionnelles ou celles de leur établissement de soins de santé. La SCA encourage fortement tous les prestataires de sédation à s'en tenir à un ensemble comparablement prudent et rigoureux de recommandations, mais reconnaît aussi qu'il peut exister des différences de pratiques entre les prestataires de sédation anesthésiologistes et non-anesthésiologistes. Nous préconisons fortement qu'au sein d'un établissement donné, il soit sérieusement envisagé d'élaborer des lignes directrices ou des règles pour la sédation procédurale, idéalement par un comité multidisciplinaire représentant tous les prestataires de sédations et les acteurs, y compris les anesthésiologistes.<sup>5</sup> Les anesthésiologistes sont les experts pour ce qui est de délivrer une sédation procédurale sécuritaire et les départements d'anesthésie devraient donc, dans la mesure où leurs ressources le permettent, s'efforcer de fournir des services de sédation élective et d'urgence dans leur établissement. Les anesthésiologistes doivent encourager le maintien de normes de sédation le plus élevé possible dans leurs établissements et, encore une fois, dans la mesure de leurs ressources, soutenir l'éducation des prestataires et assistants de sédation dans l'ensemble de leur établissement. Le concept d'équipes institutionnelles de sédation, souvent menées par un anesthésiologiste, gagne en popularité notamment pour la prestation de services de sédation en pédiatrie,<sup>6</sup> car elles ont l'avantage d'augmenter la disponibilité et la mobilité des services de sédation, et aussi de promouvoir l'éducation continue et l'acquisition d'habiletés pour les membres de l'équipe.

## Niveaux de sédation

Le Continuum de profondeur de la sédation de l'American Society of Anesthesiologists (ASA) est devenu un outil utile largement accepté pour standardiser la définition des niveaux de sédation; l'American Academy of Pediatrics et la JCAHO (Joint Commission on Accreditation of Healthcare Organizations) ont approuvé ensemble l'utilisation du Continuum de l'ASA.<sup>7</sup> Le continuum définit trois niveaux distincts de sédation : minimale, modérée et profonde. Il reconnaît aussi qu'un patient peut facilement passer du stade de sédation minimale au stade de sédation profonde et même à un quatrième niveau (c'est-à-dire une anesthésie générale). De bonnes corrélations cliniques sont requises pour améliorer la

**Tableau 1** Le Continuum de profondeur de la sédation de l'American Society of Anesthesiologists

|                           | Sédation minimale/<br>anxiolyse          | Sédation modérée/analgésie<br>(« sédation consciente »)            | Sédation profonde/analgésie                                             | Anesthésie générale                                         |
|---------------------------|------------------------------------------|--------------------------------------------------------------------|-------------------------------------------------------------------------|-------------------------------------------------------------|
| Réactivité                | Réponse normale à la stimulation verbale | Réponse intentionnelle adaptée à la stimulation verbale ou tactile | Réponse intentionnelle adaptée après stimulation répétée ou douloureuse | Sans réaction même après stimulation répétée ou douloureuse |
| Voies respiratoires       | Non affectées                            | Aucune intervention requise                                        | Une intervention peut être requise                                      | Une intervention est souvent requise                        |
| Ventilation spontanée     | Non affectée                             | Adéquate                                                           | Peut être inadéquate                                                    | Souvent inadéquate                                          |
| Fonction cardiovasculaire | Non affectée                             | Habituellement maintenue                                           | Habituellement maintenue                                                | Peut être altérée                                           |

Adapté avec l'autorisation de l'American Society of Anesthesiologists. Continuum de la profondeur de la sédation. Disponible à la page : <http://www.asahq.org/~media/sites/asahq/files/public/resources/standards-guidelines/continuum-of-depth-of-sedation-definition-of-general-anesthesia-and-levels-of-sedation-analgesia.pdf>.<sup>8</sup>

précision et la reproductibilité d'un quelconque niveau du système de mesure de la sédation.

Le continuum de sédation de l'ASA décrit en termes très précis les caractéristiques de chaque niveau de sédation, résumés dans le Tableau 1.<sup>8</sup> Le terme « sédation consciente » qui a souvent été utilisé par le passé correspond globalement à une sédation modérée. Ce terme n'est plus recommandé. La transition entre la persistance puis la perte du contact verbal constant avec le patient a lieu entre la sédation modérée et la sédation profonde. Ce point de transition est une observation importante à surveiller, mais qui n'est pas mentionné de manière spécifique dans le continuum de l'ASA. Le signe du retrait réflexe à une stimulation douloureuse ne doit pas être vu comme « intentionnelle ». Il existe de nombreuses autres « échelles » de sédation (p. ex., Ramsay) qui sont plus souvent utilisées par les prestataires de soins non-anesthésiologistes.<sup>7</sup> Ces échelles sont utiles, mais elles doivent prendre ces définitions en compte quand un chiffre est attribué à la profondeur de la sédation.

### Évaluation préprocédurale

Administrer des médicaments puissants par voie parentérale exige une évaluation du patient et leur administration par un médecin ou un autre professionnel de la santé tel qu'un assistant en anesthésie délégué ou une infirmière autorisée avec une formation spécifique et expérience de sédation procédurale. L'évaluation doit inclure la documentation des antécédents médicaux et chirurgicaux appropriés, l'identification des comorbidités médicales pertinentes, les médicaments pris par le patient et ses allergies, ainsi que les indications de la procédure. Un examen physique orienté et toutes les investigations pertinentes doivent aussi être pratiqués. La nature de la

sédation procédurale, tous ses risques significatifs et les autres options doivent être discutés avec le patient et documentés dans le dossier de santé.

La recherche d'un syndrome d'apnée-hypopnée du sommeil (SAHS) au moyen d'outils de dépistage validés, tels que le questionnaire STOP-Bang,<sup>9</sup> est recommandée. Si le patient présente un risque de SAHS ou a une forme modérée à sévère de SAHS confirmé, la sédation procédurale peut entraîner de plus grands risques et devrait être modifiée en conséquence.<sup>10</sup>

### Examen physique

L'examen physique doit être approprié et adapté aux comorbidités médicales du patient. Il doit inclure une évaluation rigoureuse des voies respiratoires du patient, incluant les facteurs prédictifs de difficultés pour la ventilation au masque et l'intubation endotrachéale, en cas de risque de dépression respiratoire et de perte de la perméabilité des voies respiratoires au cours de la sédation procédurale. L'évaluation des voies respiratoires doit être documentée de façon formelle dans le dossier médical.

### Gestion de la sédation et surveillance des patients

Les recommandations générales pour la sédation procédurale sont identiques à celles des autres formes d'anesthésie et concordent avec celles qui sont décrites dans le *Guide d'exercice de l'anesthésie* de la SCA.<sup>11</sup> Le Guide d'exercice de la SCA indique qu'il n'est pas acceptable qu'un seul médecin administre une anesthésie (y compris dans le cas d'une sédation procédurale) et réalise en même temps la procédure diagnostique ou



thérapeutique, hormis le cas de procédures effectuées avec seulement une infiltration d'anesthésique local et/ou une sédation minimale.

La fréquence cardiaque, la pression artérielle, la fréquence respiratoire, la saturation en oxygène et le niveau de sédation/conscience doivent être suivis et documentés pour tous les patients subissant une sédation procédurale. La surveillance de la saturation en oxygène (c'est-à-dire, l'oxymétrie de pouls) doit être continue et consignée à intervalles réguliers en même temps que les autres constantes vitales. Pour les procédures peu invasives chez des patients sélectionnés sans maladie cardiorespiratoire significative, les recommandations habituelles de la SCA concernant la surveillance électrocardiographique peuvent être ignorées si une mesure continue de l'oxymétrie de pouls est utilisée et que la sédation appliquée est seulement minimale à modérée.

Un suivi de capnographie continue est requis pour les patients devant subir une sédation procédurale modérée à profonde (voir la rubrique « Capnographie »). Il est fortement recommandé qu'en plus de l'observation constante des signes cliniques, la fréquence et la qualité de la ventilation soient surveillées et documentées de manière régulière avec un suivi de capnographie pour tous les patients subissant une sédation procédurale.

L'administration systématique d'oxygène par lunette nasale ou masque facial à haut débit est fortement recommandée pour tous les patients subissant une sédation procédurale et est requise en cas de sédation profonde. Les précautions appropriées doivent être prises pour limiter le risque d'incendie dans la salle de procédure en raison de l'atmosphère enrichie qui pourrait être créée par l'utilisation d'un supplément d'oxygène, en particulier pour les procédures concernant les zones céphaliques et cervicales.

Les études cliniques ont montré que le niveau de sédation peut devenir plus profond que ce qui était recherché.<sup>12</sup> En conséquence, l'équipement approprié doit être facilement disponible et en état de fonctionner pour gérer les patients présentant une dépression cardiorespiratoire significative. L'équipement suivant (en différentes tailles en fonction de la population de patients servis par l'établissement) doit être disponible :

- Équipement pour les voies respiratoires et autres ressources recommandées
  - Respirateur manuel à ballon autogonflant (type Ambu) et masques faciaux
  - Manche et lames de laryngoscope
  - Dispositifs de voies respiratoires supraglottiques

- Équipement pour la gestion de l'accès aux voies respiratoires difficiles, tel que (sans s'y limiter) des stylets intubation, bougies, échangeurs de voies respiratoires et vidéolaryngoscopes selon les types de cas gérés et la spécificité de l'établissement
- Dispositifs bucco- et rhinopharyngés pour voies respiratoires
- Tubes endotrachéaux avec seringue de gonflage du ballon et manomètre pour la pression du ballonnet
- Ruban adhésif et autres fournitures pour le maintien du tube endotrachéal en place
- Stéthoscope
- Dispositif d'aspiration de grade hospitalier avec canules et cathéters appropriés
- Source d'oxygène dédié, lunettes nasales et masques faciaux pour oxygène
- Un équipement de surveillance du taux de dioxyde de carbone en fin de respiration est requis en cas de sédation modérée ou profonde (voir la rubrique « Capnographie »)
- Trousse de cricothyroïdotomie

- Accès vasculaire

- Équipements et expertise nécessaires pour obtenir un accès intraveineux

- Médicaments

- Antagonistes des agents sédatifs s'il y a lieu (par exemple, flumazénil, naloxone)
- Médicament de réuscitation (p. ex., adrénaline, vasopressine, atropine)

- Équipement d'urgence

- Défibrillateur, chariot pour arrêt cardiaque avec système de maintien des fonctions vitales. (ACLS — Advanced Cardiovascular Life Support) et aides cognitives

Les demandes précises concernant le jeûne précédant la procédure évoluent. D'une manière générale, les patients recevant une sédation modérée ou profonde doivent être à jeun conformément aux recommandations générales de la SCA :

- Huit heures après un repas incluant viande, friture ou aliments gras.
- Six heures après un repas léger, un biberon de lait maternisé ou de lait non humain.

- Quatre heures après l'ingestion de lait maternel non enrichi.
- Deux heures après l'absorption de liquide translucide.

Des recommandations plus libérales peuvent être appropriées pour une sédation minimale (p. ex., chirurgie pour cataracte). Néanmoins, elles doivent être personnalisées et les prestataires de soins doivent faire preuve de prudence en tenant compte des comorbidités propres aux patients et des facteurs de risque spécifiques d'aspiration pulmonaire du contenu gastrique.

Tout professionnel de la santé utilisant des agents sédatifs-hypnotiques pour obtenir une sédation doit avoir l'expertise, l'expérience, l'équipement et les autres ressources disponibles pour la ressuscitation des patients. En conséquence, un certificat en technique spécialisée de réanimation cardiorespiratoire est fortement recommandé. Ils doivent être capables d'assurer une gestion avancée des voies respiratoires et de « sauver » les patients dont la sédation devient plus profonde que prévu et développe une dépression respiratoire ou des apnées.<sup>13</sup> L'absence de réponse rapide et appropriée à de telles circonstances peut déboucher sur des complications engageant le pronostic vital tel qu'une lésion hypoxique du cerveau, l'aspiration pulmonaire du contenu gastrique et un arrêt cardiaque.

### Capnographie

Le *Guide d'exercice* de la SCA indique que la surveillance continue du dioxyde de carbone en fin de respiration (tracé de capnographie) est obligatoire au cours d'une anesthésie générale et pendant une sédation procédurale modérée à profonde. Quelques études ont montré que les capacités de détection d'une dépression respiratoire au cours de la sédation procédurale sont significativement améliorées avec le suivi de la capnographie.<sup>14</sup> En cas de sédation minime, la capnographie peut être un apport utile pour détecter la progression vers un niveau de sédation avec dépression respiratoire associée non souhaité; elle est donc recommandée. La capnographie est utile pour le suivi de la ventilation des patients quand celle-ci ne peut pas être directement observée (p. ex., au cours d'une imagerie par résonance magnétique), quand plusieurs agents sédatifs sont utilisés et quand l'évaluation avant procédure a identifié un risque clinique accru de dépression respiratoire ou d'obstruction des voies respiratoires (p. ex., obésité morbide, SAHS).

### Réalisation de la sédation et délégation

La sédation peut être assurée par une équipe incluant un superviseur de sédation (habituellement l'anesthésiologiste ou un autre médecin) et un ou plusieurs assistants de sédation approuvés et dûment accrédités (p. ex., infirmière autorisée, inhalothérapeute, assistant d'anesthésie ou tout autre professionnel de la santé dûment formé). Il incombe au département d'anesthésiologie de définir les qualifications, fonctions et responsabilités spécifiques des assistants de sédation. L'équipe de sédation doit travailler ensemble à sa réalisation en effectuant des tâches spécifiques 1) d'évaluation du patient, 2) de sédation proprement dite et 3) de surveillance du patient.

En cas de sédation minimale à modérée chez des patients stables :

- Le superviseur de sédation pourra déléguer l'administration de la sédation et la surveillance du patient à un assistant de sédation.
- L'assistant de sédation doit rester en permanence auprès du patient, assurant une surveillance continue et informant immédiatement le superviseur de sédation à la moindre préoccupation.
- Un membre de l'équipe de sédation doit surveiller le patient en permanence.
- Le superviseur de sédation doit rester immédiatement disponible pour seconder l'assistant de sédation si nécessaire.
- Le superviseur de sédation (anesthésiologiste/médecin) conserve la responsabilité du patient.

En cas de sédation profonde :

- Le *Guide d'exercice de la SCA* indique qu'il n'est pas acceptable qu'un anesthésiologiste réalise ou supervise l'administration d'une sédation procédurale profonde en même temps que des procédures diagnostiques ou thérapeutiques chez plus d'un patient au même moment.

### Ratios de surveillance

Dans les circonstances spécifiques où une sédation minime à modérée est administrée, un anesthésiologiste pourrait superviser plus d'un patient à la fois tout en respectant strictement les principes décrits plus haut. Il est essentiel d'insister à nouveau sur le fait qu'une personne correctement formée et accréditée doit être en

**Tableau 2** Score modifié d'Aldrete et système de cotation du congé postanesthésique (PADSS)

| Score d'Aldrete modifié<br>(Validé pour le congé d'une salle de réveil vers<br>un autre service de l'établissement de soins) | Système de cotation de congé postanesthésique (PADSS)<br>(Validé pour évaluer le congé des patients retournant chez eux) |
|------------------------------------------------------------------------------------------------------------------------------|--------------------------------------------------------------------------------------------------------------------------|
| Respiration                                                                                                                  | Constantes vitales (comparativement aux valeurs de référence avant procédure)                                            |
| Capable de prendre une respiration<br>profonde et de tousser = 2                                                             | Valeurs de la PA et de la FC dans une marge de 20 % par rapport à la valeur de<br>référence = 2                          |
| Dyspnée/respiration superficielle = 1                                                                                        | Valeurs de la PA et de la FC dans une marge de 20 % à 40 % par rapport à la valeur<br>de référence = 1                   |
| Apnée = 0                                                                                                                    | Valeurs de la PA et de la FC > 40 % au-dessus ou en dessous de la valeur de<br>référence = 0                             |
| SpO <sub>2</sub>                                                                                                             | Activité                                                                                                                 |
| Reste >92 % en air ambiant = 2                                                                                               | Démarche stable, pas de vertiges/d'étourdissements ou identique à l'état<br>préopératoire = 2                            |
| A besoin d'O <sub>2</sub> supplémentaire pour rester<br>> 90 % = 1                                                           | A besoin d'aide = 1                                                                                                      |
| < 90 % même avec de l'O <sub>2</sub> supplémentaire = 0                                                                      | Incapable de déambuler = 0                                                                                               |
| Conscience                                                                                                                   | Nausées et vomissements                                                                                                  |
| Parfaitement éveillé = 2                                                                                                     | Minime ou contrôlé avec un médicament par voie orale = 2                                                                 |
| Peut être éveillé si appelé = 1                                                                                              | Modérée ou contrôlée avec un médicament par voie parentérale = 1                                                         |
| Ne répond pas = 0                                                                                                            | Sévère ou se poursuit malgré le traitement = 0                                                                           |
| Circulation (comparativement aux valeurs de référence<br>avant procédure)                                                    | Douleur                                                                                                                  |
| PA ± 20 mmHg = 2                                                                                                             | Minime ou modérée (score 0 à 3) = 2                                                                                      |
| PA ± 20 à 50 mmHg = 50                                                                                                       | Modérée (score 4 à 6) = 1                                                                                                |
| PA ± 50 mmHg = 0                                                                                                             | Sévère (score 7 à 10) = 0                                                                                                |
| Activité                                                                                                                     | Saignement chirurgical                                                                                                   |
| Capable de bouger les quatre membres = 2                                                                                     | Minime ou aucun changement de pansement requis = 2                                                                       |
| Capable de bouger les deux membres = 1                                                                                       | Modérée ou jusqu'à deux changements de pansement requis = 1                                                              |
| Incapable de bouger un membre = 0                                                                                            | Sévère ou plus de trois changements de pansement requis = 0                                                              |

Scores maximum = 10. Un score modifié d'Aldrete  $\geq 9$  est jugé acceptable pour un congé de la récupération de la Phase 1 à la Phase 2; un score PADSS  $\geq 9$  est jugé acceptable pour un congé de la Phase 2 ou un retour direct au domicile après seulement une phase de récupération. L'échelle de douleur numérique analogique (0 à 10) est recommandée pour l'évaluation de la douleur post procédurale. PA = pression artérielle; FC = fréquence cardiaque.

D'après : Aldrete JA. The post-anesthesia recovery score revisited. *J Clin Anesth* 1995; 7: 89-91;<sup>17</sup> et Chung F, Chan VW, Ong D. A post-anesthetic discharge scoring system for home readiness after ambulatory surgery. *J Clin Anesth* 1995; 7: 500-6.<sup>18</sup>

permanence au chevet de chaque patient recevant des soins. L'anesthésiologiste traitant doit assumer la responsabilité médicale des soins de tous les patients concernés par ce modèle de soins et doit être immédiatement disponible pour s'occuper de tout patient si nécessaire. Chaque département d'anesthésiologie doit définir le nombre acceptable de patients simultanés. Les facteurs importants à prendre en compte sont notamment l'intensité et la complexité des cas, l'état physique des patients, le personnel assistant de sédation et son expérience, ainsi que toutes les règles et procédures de l'établissement.

### Médicaments utilisés pour la sédation procédurale

Ce document ne fournit pas une analyse détaillée des avantages ou propriétés spécifiques de tous les médicaments disponibles est utilisée pour une sédation procédurale. Les anesthésiologistes et assistants en anesthésie connaissent la pharmacologie et les propriétés de ces agents et ont l'expérience de leur utilisation. La SCA soutient plusieurs principes fondamentaux qui doivent être appliqués par tous les prestataires de sédation, quel que soit l'environnement. Le principe fondamental de la sédation procédurale est que la sédation doit être aussi légère que possible en tenant compte de la procédure

spécifique du patient. D'une manière générale, le médicament doit être administré en petites doses ou en perfusion continue dosée pour l'obtention de l'effet clinique, laissant suffisamment de temps pour évaluer la profondeur maximum de la sédation obtenue et prenant en compte les variations du niveau de douleur et de stimulation liées à la procédure. Il est essentiel de connaître le délai d'action, l'effet maximum et la durée d'action de chaque médicament. Quand plusieurs médicaments sont utilisés (notamment en association avec des opioïdes), il est essentiel de tenir compte des effets synergiques possibles sur le niveau de sédation et du risque accru de dépression respiratoire. Lorsque cela est possible, une anesthésie locale ou régionale doit être fortement envisagée en plus de la sédation pour les procédures particulièrement douloureuses. Différentes combinaisons de médicaments peuvent être utilisées pour administrer une sédation procédurale et il devrait s'agir, de préférence, de médicaments pouvant être titrés et à courte durée d'action. Des agents sédatifs-hypnotiques puissants (en particulier le propofol) sont de plus en plus souvent adoptés par les anesthésiologistes et les non-anesthésiologistes pour fournir une sédation procédurale modérée à profonde d'excellente qualité avec des taux élevés de satisfaction du patient et un profil de récupération plus rapide qu'avec d'autres combinaisons médicamenteuses.

Cependant, quand des agents anesthésiques tels que le propofol sont utilisés pour une sédation procédurale, il y a un plus grand risque de provoquer une anesthésie générale involontaire, même quand ils sont administrés avec prudence. Tous les prestataires de sédation utilisant des produits tels que le propofol doivent avoir reçu une formation spécifique et avoir l'expérience de leur utilisation, prendre toutes les précautions de monitoring nécessaires et disposer immédiatement de l'équipement et des habiletés requises pour gérer les voies aériennes et fournir la ventilation/le soutien cardiovasculaire associés à des périodes d'anesthésie générale, même brèves.<sup>15,16</sup>

## Récupération et congé

Les soins post procédure d'un patient ayant subi une sédation peuvent être délégués à des personnes qualifiées et correctement formées. Un monitoring est requis au cours de la première période de récupération post procédure, comme l'indique le *Guide d'exercice* de la SCA, et doit porter sur le niveau de conscience, la ventilation, la saturation en oxygène, la fréquence cardiaque et la pression artérielle. La fréquence et la durée appropriées du monitoring doivent être déterminées par les normes de

l'établissement en tenant compte la durée et la complexité de la procédure en question, la complexité du cas du patient et le niveau de sédation atteint. Le congé peut être donné au patient après une évaluation avec des critères validés, tel que le score modifié d'Aldrete<sup>17</sup> pour la récupération de Phase 1 quand le patient est renvoyé d'une salle de réveil vers un autre service de l'établissement de soin, ou le système de cotation de congé post anesthésique pour la récupération de Phase 2<sup>18</sup> quand le patient retourne à son domicile (Tableau 2). Si le patient doit rentrer chez lui, le médecin responsable ou le médecin délégué le remplaçant doit être disponible pour s'occuper du patient jusqu'à ce que les normes établies par l'établissement pour le congé soient remplies. Indépendamment du niveau de sédation procédurale réalisé, les procédures de congé pour la période postanesthésique doivent être conformes au *Guide d'exercice de l'anesthésie* de la SCA.

## Suivi de qualité

La pratique de la sédation procédurale doit suivre la même attention rigoureuse concernant l'évolution des patients que celle qui s'applique aux autres formes de soins anesthésiques. Un mécanisme spécifique doit être mis en place pour la vérification de la sédation procédurale et la documentation de toutes les complications majeures, événements indésirables ou incidents critiques. Tous les incidents critiques doivent être systématiquement analysés et déboucher sur les recommandations appropriées pour des améliorations quand il y a lieu.

**Acknowledgements** Contributions to the earlier version of this position paper from former members of the CAS Committee on Standards to the Practice of Anesthesia are gratefully acknowledged.

**Competing interests** All authors of this article are members of the Standards Committee of the Canadian Anesthesiologists' Society (CAS). None of the authors have any financial or commercial interests relating to any companies or manufacturers of equipment or medications referenced in this article. Dr. Gregory Dobson is the Chair of the Committee on Standards of the CAS.

**Editorial responsibility** This submission was handled by Dr. Hilary P. Grocott, Editor-in-Chief, *Canadian Journal of Anesthesia*.

**Remerciements** Les auteurs sont très reconnaissants envers les anciens membres du Comité des normes de l'exercice de l'anesthésie de la SCA pour leurs contributions à la version précédente de cet exposé de principe.

**Conflits d'intérêts** Tous les auteurs de cet article sont membres du Comité des normes de la Société canadienne des anesthésiologistes (SCA). Aucun auteur n'a de lien financier ou commercial avec les sociétés pharmaceutiques ou fabricants d'équipements mentionnés dans cet article. Le Dr Gregory Dobson est le président du Comité des normes de la SCA.

**Responsabilité éditoriale** Cet article a été traité par le Dr Hilary P. Grocott, Rédacteur en chef, *Journal canadien d'anesthésie*.

## References

1. Metzner J, Domino KB. Risks of anesthesia or sedation outside the operating room: the role of the anesthesia care provider. *Curr Opin Anaesthesiol* 2010; 23: 523-31.
2. Metzner J, Posner KL, Domino KB. The risk and safety of anesthesia at remote locations: the US closed claims analysis. *Curr Opin Anaesthesiol* 2009; 22: 502-8.
3. *Canadian Medical Protective Association*. Medical-legal issues involving the use of procedural sedation. *Safe Medical Care: Medical Care Analytics*; 2018 .
4. Newton M, Blightman K. Guidance for the Provision of Anaesthesia Services (GPAS). Guidance on the Provision of Sedation Services 2016; Chapter 19. Available from URL: <https://www.rcoa.ac.uk/system/files/GPAS-2016-19-SEDATION.pdf> (accessed July 2018).
5. Antonelli MT, Seaver D, Urman RD. Procedural sedation and implications for quality and risk management. *J Healthc Risk Manag* 2013; 33: 3-10.
6. Davis CL. Does your facility have a pediatric sedation team? If not, why not? *Pediatr Nurs* 2008; 34: 308-9.
7. Andropoulos DB. Sedation scales and discharge criteria. How do they differ? Which one to choose? Do they really apply to sedation? In: Mason KP, editor. *Pediatric Sedation Outside of the Operating Room: A multispecialty international collaboration – Second Edition*. New York: Springer; 2015. p. 71-2.
8. *American Society of Anesthesiologists*. Continuum of Depth of Sedation. Available from URL: <http://www.asahq.org/~media/sites/asahq/files/public/resources/standards-guidelines/continuum-of-depth-of-sedation-definition-of-general-anesthesia-and-levels-of-sedation-analgesia.pdf> (accessed July 2018).
9. Nagappa M, Liao P, Wong J, et al. Validation of the STOP-Bang questionnaire as a screening tool for obstructive sleep apnea among different populations: a systematic review and meta-analysis. *PLoS One* 2015; 10: e0143697.
10. Jirapinyo P, Thompson CC. Sedation challenges: obesity and sleep apnea. *Gastrointest Endosc Clin N Am* 2016; 26: 527-37.
11. Dobson G, Chong M, Chow L, et al. Guidelines to the practice of anesthesia - revised edition 2018. *Can J Anesth* 2018; 65: 76-104.
12. Patel S, Vargo JJ, Khandwala F, et al. Deep sedation occurs frequently during elective endoscopy with meperidine and midazolam. *Am J Gastroenterol* 2005; 100: 2689-95.
13. Blayney MR. Procedural sedation for adult patients: an overview. *Continuing Education in Anaesthesia, Critical Care and Pain* 2012; 12: 176-80.
14. Saunders R, Struys MM, Pollock RF, Mestek M, Lightdale JR. Patient safety during procedural sedation using capnography monitoring: a systematic review and meta-analysis. *BMJ Open* 2017; 7: e013402.
15. *Institute for Safe Medication Practices*. Propofol sedation: who should administer?. Newsletter November: Acute Care - ISMP Medication Safety Alert; 2005 .
16. *American Society of Anesthesiologists*. Statement on safe use of propofol. Committee on ambulatory surgical care, House of Delegates, amended 2014. Available from URL: <http://www.asahq.org/quality-and-practice-management/standards-guidelines-and-related-resources/statement-on-safe-use-of-propofol> (accessed July 2018).
17. Aldrete JA. The post-anesthesia recovery score revisited. *J Clin Anesth* 1995; 7: 89-91.
18. Chung F, Chan VW, Ong D. A post-anesthetic discharge scoring system for home readiness after ambulatory surgery. *J Clin Anesth* 1995; 7: 500-6.
